# Supplementary material for: Infratentorial Stereotactic Biopsy of Brainstem and Cerebellar Lesions
Source: MDPI journal article supplement (doi:10.3390/brainsci11111432), 2021-10-28
Supplement: s1 [file s1]

**Table S1.** Relationship between age, gender, KPS, and diagnosis (N=190).

| Diagnosis                             | Age  |    | Karnofsky<br>Performance Score |    | Gender |            |      |            |
|---------------------------------------|------|----|--------------------------------|----|--------|------------|------|------------|
|                                       |      |    |                                |    | Female |            | Male |            |
|                                       | Mean | SD | Mean                           | SD | N      | Row<br>N % | N    | Row<br>N % |
| Astrocytoma grade 3                   | 37   | 13 | 80                             | 15 | 15     | 40.5%      | 22   | 59.5%      |
| Posterior fossa<br>ependymoma grade 3 | 31   | 9  | 65                             | 7  | 1      | 33.3%      | 2    | 66.7%      |
| Oligodendroglioma grade<br>3          | 33   | 1  | 85                             | 7  | 2      | 100.0%     | 0    | 0.0%       |
| Non-neoplastic lesion                 | 44   | 17 | 86                             | 16 | 9      | 64.3%      | 5    | 35.7%      |
| Astrocytoma grade 2                   | 35   | 15 | 88                             | 13 | 31     | 45.6%      | 37   | 54.4%      |
| Ependymoma                            | 44   | 22 | 83                             | 15 | 2      | 50.0%      | 2    | 50.0%      |
| Glioblastoma                          | 43   | 17 | 79                             | 12 | 9      | 60.0%      | 6    | 40.0%      |
| Lymphoma                              | 59   | 12 | 84                             | 14 | 12     | 70.6%      | 5    | 29.4%      |
| Medulloblastoma                       | 34   | 8  | 95                             | 7  | 1      | 50.0%      | 1    | 50.0%      |
| Metastatic tumor                      | 62   | 9  | 77                             | 11 | 3      | 30.0%      | 7    | 70.0%      |
| Not available                         | 45   | 12 | 83                             | 17 | 1      | 20.0%      | 4    | 80.0%      |
| Non-diagnostic biopsy                 | 47   | 15 | 78                             | 13 | 5      | 62.5%      | 3    | 37.5%      |
| Pilocytic astrocytoma                 | 24   | 7  | 95                             | 7  | 4      | 1000%      | 0    | 0.0%       |
| Meningioma grade 1                    | 42   | .  | 90                             | .  | 1      | 100.0%     | 0    | 0.0%       |

*Note: N=190; SD - Standard Deviation.*

**Table S2.** The relationship between serum antibody status, frequency of magnetic resonance imaging (MRI) contrast enhancement, and diagnosis.

| Diagnosis             | Epstein–Barr virus seropositivity |       |          |        | Toxoplasmosis seropositivity |        |          |        | Contrast enhancement |       |     |        |
|-----------------------|-----------------------------------|-------|----------|--------|------------------------------|--------|----------|--------|----------------------|-------|-----|--------|
|                       | Negative                          |       | Positive |        | Negative                     |        | Positive |        | No                   |       | Yes |        |
|                       | N                                 | %     | N        | %      | N                            | %      | N        | %      | No                   | %     | N   | %      |
| Astrocytoma grade 3   | 3                                 | 18.8% | 13       | 81.3%  | 6                            | 35.3%  | 11       | 64.7%  | 10                   | 45.5% | 12  | 54.5%  |
| Non-neoplastic lesion | 3                                 | 33.3% | 6        | 66.7%  | 6                            | 66.7%  | 3        | 33.3%  | 5                    | 62.5% | 3   | 37.5%  |
| Astrocytoma grade 2   | 2                                 | 10.0% | 18       | 90.0%  | 16                           | 80.0%  | 4        | 20.0%  | 25                   | 64.1% | 14  | 35.9%  |
| Ependymoma            | 0                                 |       | 2        | 100.0% | 2                            | 100.0% | 0        | 0.0%   | 0                    | 0.0%  | 3   | 100.0% |
| Glioblastoma          | 0                                 |       | 5        | 100.0% | 0                            | 0.0%   | 5        | 100.0% | 0                    | 0.0%  | 9   | 100.0% |
| Lymphoma              | 0                                 |       | 6        | 100.0% | 3                            | 50.0%  | 3        | 50.0%  | 1                    | 9.1%  | 10  | 90.9%  |
| Metastatic tumor      | 0                                 |       | 4        | 100.0% | 0                            | 0.0%   | 4        | 100.0% | 0                    | 0.0%  | 6   | 100.0% |
| Non-diagnostic biopsy | 1                                 | 50.0% | 1        | 50.0%  | 1                            | 50.0%  | 1        | 50.0%  | 4                    | 57.1% | 3   | 42.9%  |
| Pilocytic astrocytoma | 0                                 |       | 2        | 100.0% | 2                            | 100.0% | 0        | 0.0%   | 1                    | 50.0% | 1   | 50.0%  |

Note:  $N_1 = 66$ ;  $N_2 = 67$ ,  $N_3=112$

**Table S3.** Descriptive statistics of the patient group underwent supratentorial biopsy of cerebral peduncles lesions.

|                           | N  | %     |
|---------------------------|----|-------|
| Sex                       |    |       |
| Female                    | 23 | 36.5% |
| Male                      | 40 | 63.5% |
| Age, years (mean; SD)     | 51 | 16    |
| KPS (mean; SD)            | 77 | 15.0% |
| Diagnosis                 |    |       |
| Astrocytoma grade 3       | 14 | 22.2% |
| Glioblastoma              | 11 | 17.5% |
| Lymphoma                  | 11 | 17.5% |
| Astrocytoma grade 2       | 9  | 14.3% |
| Metastasis                | 9  | 14.3% |
| Nondiagnostic             | 2  | 3.2%  |
| Oligoastrocytoma          | 2  | 3.2%  |
| Oligodendroglioma grade 3 | 1  | 1.6%  |
| Ependymoma                | 1  | 1.6%  |
| Ganglioglioma             | 1  | 1.6%  |
| Non neoplastic            | 1  | 1.6%  |
| Pilocytic Astrocytoma     | 1  | 1.6%  |
| Multifocal tumors         | 4  | 100%  |
| Lymphoma                  | 1  | 25%   |
| Astrocytoma grade 2       | 1  | 25%   |
| Glioblastoma              | 1  | 25%   |
| Metastasis                | 1  | 25%   |
| Molecular evaluation*     |    |       |
| IDH-mutant                | 1  | 20%   |
| IDH-wildtype              | 4  | 80%   |

|                     |   |     |
|---------------------|---|-----|
| MGMT methylated     | 4 | 80% |
| MGMT unmethylated   | 1 | 20% |
| 1p/19q codeleted    | 1 | 20% |
| 1p/19q noncodeleted | 4 | 80% |

---

*Note: KPS - Karnofsky Performance Scale. SD - Standard Deviation. NA - not available. \* - Biopsy material was subjected to molecular testing in 6 patients, which was non-diagnostic in one patient.*
